# Diastematomyelia

## Split Cord Malformation

Andrew M. Sack, M.D., Talal W. Khan, M.D., M.B.A.

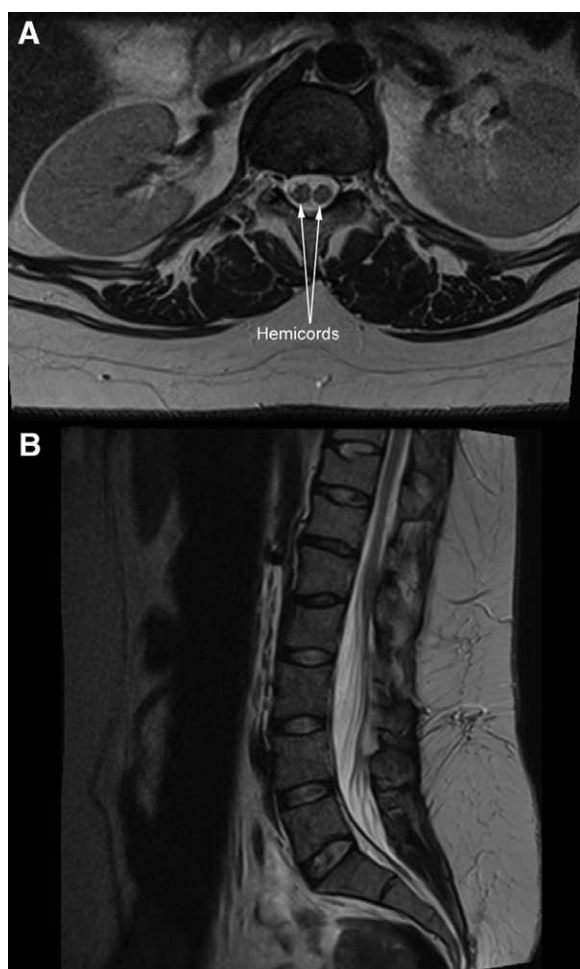

**D**IASTEMATOMYELIA or split cord malformation is a rare phenomenon that may be discovered on magnetic resonance imaging of the spine. These images are from the case of a 29-yr-old woman with back pain without neurological symptoms. She also had spina bifida occulta. Figure A is an axial T2-weighted image at the T12 level demonstrating diastematomyelia with two hemicords sharing a single dural sac. A mid-sagittal image from the same scan is relatively unremarkable (fig. B).

Diastematomyelia is typically associated with vertebral anomalies.<sup>1</sup> Type 1 involves two hemicords with separate dural sacs and accounts for 40% of cases; it commonly causes neurological symptoms in childhood because of cord tethering. Type 2, seen here, involves the hemicords sharing a single dural sac and accounts for 60% of cases; it is usually asymptomatic.<sup>2</sup> Splitting typically occurs between T9 and S1 but has been reported at cervical levels. There is no correlation between the level of splitting and the neurological symptoms.<sup>2</sup>

Neuraxial anesthesia must be carefully considered. If vertebral anomalies are present, the epidural space may be absent, and attempts to access it may result in dural puncture. There is a case report of successful spinal anesthesia on a parturient with undiagnosed type 2 diastematomyelia, although she did experience a right leg paresthesia during needle placement, as well as a transient left radiculopathy after resolution of the anesthetic.<sup>3</sup> There are no reports of spinal anesthesia in patients with type 1, but the separation of dural sacs may result in a unilateral or unexpected distribution of anesthesia.

### Competing Interests

The authors declare no competing interests.

### Correspondence

Address correspondence to Dr. Sack: [asack@kumc.edu](mailto:asack@kumc.edu)

### References

1. Lewandrowski KU, Rachlin JR, Glazer PA: Diastematomyelia presenting as progressive weakness in an adult after spinal fusion for adolescent idiopathic scoliosis. *Spine J* 2004; 4:116–9
2. Cheng B, Li FT, Lin L: Diastematomyelia: A retrospective review of 138 patients. *J Bone Joint Surg Br* 2012; 94:365–72
3. Wenger M, Hauswirth CB, Brodhage RP: Undiagnosed adult diastematomyelia associated with neurological symptoms following spinal anaesthesia. *Anaesthesia* 2001; 56:764–7

From the Department of Anesthesiology, University of Kansas Medical Center, Kansas City, Kansas.

Copyright © 2016, the American Society of Anesthesiologists, Inc. Wolters Kluwer Health, Inc. All Rights Reserved. *Anesthesiology* 2016; 125:397
